# Supplementary material
Source: publisher figshare collection journal article supplement (https://springernature.figshare.com/ndownloader/files/21474666)
Supplement: Supplementary file [file 21474666]

**Additional file 3: Text S1.** Significant results from statistical analyses in this study.

**Fig. 6b:**

**Ratio (TNF/GAPDH)**

One-way ANOVA:  $F_{(5, 12)} = 152$ ,  $P < 0.0001$

Dunnett's multiple comparisons test:

NC vs. LPS: Mean diff =  $-0.763$  (95% CI:  $-0.920$  to  $-0.607$ ),  $P < 0.0001$

NC vs. fowlerstefin (3h): Mean diff =  $-1.10$  (95% CI:  $-1.26$  to  $-0.947$ ),  $P < 0.0001$

NC vs. fowlerstefin (6h): Mean diff =  $-1.11$  (95% CI:  $-1.27$  to  $-0.957$ ),  $P < 0.0001$

NC vs. fowlerstefin (9h): Mean diff =  $-1.11$  (95% CI:  $-1.27$  to  $-0.954$ ),  $P < 0.0001$

NC vs. fowlerstefin (12h): Mean diff =  $-1.27$  (95% CI:  $-1.43$  to  $-1.12$ ),  $P < 0.0001$

**Ratio (IL-1 $\alpha$ /GAPDH)**

One-way ANOVA:  $F_{(5, 12)} = 234$ ,  $P < 0.0001$

Dunnett's multiple comparisons test:

NC vs. LPS: Mean diff =  $-0.897$  (95% CI:  $-1.02$  to  $-0.772$ ),  $P < 0.0001$

NC vs. fowlerstefin (3h): Mean diff =  $-1.05$  (95% CI:  $-1.18$  to  $-0.927$ ),  $P < 0.0001$

NC vs. fowlerstefin (6h): Mean diff =  $-1.07$  (95% CI:  $-1.19$  to  $-0.946$ ),  $P < 0.0001$

NC vs. fowlerstefin (9h): Mean diff =  $-1.16$  (95% CI:  $-1.28$  to  $-1.03$ ),  $P < 0.0001$

NC vs. fowlerstefin (12h): Mean diff =  $-1.28$  (95% CI:  $-1.40$  to  $-1.16$ ),  $P < 0.0001$

**Ratio (IL-1 $\beta$ /GAPDH)**

One-way ANOVA:  $F_{(5, 12)} = 30.9$ ,  $P < 0.0001$

Dunnett's multiple comparisons test:

NC vs. LPS: Mean diff =  $-0.648$  (95% CI:  $-0.908$  to  $-0.387$ ),  $P < 0.0001$

NC vs. fowlerstefin (3h): Mean diff =  $-0.856$  (95% CI:  $-1.12$  to  $-0.595$ ),  $P < 0.0001$

NC vs. fowlerstefin (6h): Mean diff =  $-0.798$  (95% CI:  $-1.06$  to  $-0.538$ ),  $P < 0.0001$

NC vs. fowlerstefin (9h): Mean diff =  $-0.888$  (95% CI:  $-1.15$  to  $-0.627$ ),  $P < 0.0001$

NC vs. fowlerstefin (12h): Mean diff =  $-0.949$  (95% CI:  $-1.21$  to  $-0.688$ ),  $P < 0.0001$

**Ratio (IL-6/GAPDH)**

One-way ANOVA:  $F_{(5, 12)} = 155$ ,  $P < 0.0001$

Dunnett's multiple comparisons test:

NC vs. LPS: Mean diff =  $-0.761$  (95% CI:  $-0.912$  to  $-0.610$ ),  $P < 0.0001$

NC vs. fowlerstefin (3h): Mean diff =  $-0.986$  (95% CI:  $-1.14$  to  $-0.835$ ),  $P < 0.0001$

NC vs. fowlerstefin (6h): Mean diff =  $-0.939$  (95% CI:  $-1.09$  to  $-0.788$ ),  $P < 0.0001$

NC vs. fowlerstefin (9h): Mean diff =  $-1.17$  (95% CI:  $-1.32$  to  $-1.02$ ),  $P < 0.0001$

NC vs. fowlerstefin (12h): Mean diff =  $-1.29$  (95% CI:  $-1.44$  to  $-1.14$ ),  $P < 0.0001$

**Fig. 6c:**

**TNF (pg/ml)**

One-way ANOVA:  $F_{(5, 12)} = 209$ ,  $P < 0.0001$

Dunnett's multiple comparisons test:

NC vs. LPS: Mean diff =  $-576$  (95% CI:  $-635$  to  $-516$ ),  $P < 0.0001$

NC vs. fowlerstefin (3h): Mean diff =  $-424$  (95% CI:  $-483$  to  $-364$ ),  $P < 0.0001$

NC vs. fowlerstefin (6h): Mean diff =  $-454$  (95% CI:  $-513$  to  $-394$ ),  $P < 0.0001$

NC vs. fowlerstefin (9h): Mean diff =  $-560$  (95% CI:  $-620$  to  $-501$ ),  $P < 0.0001$

NC vs. fowlerstefin (12h): Mean diff = -387 (95% CI: -446 to -327),  $P < 0.0001$

#### **IL-6 (pg/ml)**

One-way ANOVA:  $F_{(5, 12)} = 178$ ,  $P < 0.0001$

Dunnett's multiple comparisons test:

NC vs. LPS: Mean diff = -131 (95% CI: -154 to -108),  $P < 0.0001$

NC vs. fowlerstefin (3h): Mean diff = -73.9 (95% CI: -97.0 to -50.8),  $P < 0.0001$

NC vs. fowlerstefin (6h): Mean diff = -150 (95% CI: -173 to -127),  $P < 0.0001$

NC vs. fowlerstefin (9h): Mean diff = -205 (95% CI: -228 to -182),  $P < 0.0001$

NC vs. fowlerstefin (12h): Mean diff = -180 (95% CI: -203 to -157),  $P < 0.0001$

#### **Fig. 7a:**

##### **Ratio (TNF/GAPDH)**

One-way ANOVA:  $F_{(8, 18)} = 75.8$ ,  $P < 0.0001$

Dunnett's multiple comparisons test:

fowlerstefin vs. NC: Mean diff = 1.11 (95% CI: 0.928 to 1.30),  $P < 0.0001$

fowlerstefin vs. LPS: Mean diff = -38.1 (95% CI: -59.0 to -17.1),  $P = 0.0255$

fowlerstefin vs. SP600125 (1  $\mu$ M): Mean diff = 144 (95% CI: 123 to 165),  $P < 0.0001$

fowlerstefin vs. SP600125 (10 M): Mean diff = 246 (95% CI: 225 to 267),  $P < 0.0001$

fowlerstefin vs. SB203580 (1  $\mu$ M): Mean diff = 46.0 (95% CI: 25.1 to 66.9),  $P = 0.0324$

fowlerstefin vs. SB203580 (10  $\mu$ M): Mean diff = 283 (95% CI: 262 to 304),  $P < 0.0001$

fowlerstefin vs. U0126 (1  $\mu$ M): Mean diff = 61.9 (95% CI: 41.0 to 82.9),  $P = 0.0004$

fowlerstefin vs. U0126 (10  $\mu$ M): Mean diff = 275 (95% CI: 254 to 296),  $P < 0.0001$

##### **Ratio (IL-6/GAPDH)**

One-way ANOVA:  $F_{(8, 18)} = 335$ ,  $P < 0.0001$

Dunnett's multiple comparisons test:

fowlerstefin vs. NC: Mean diff = 0.925 (95% CI: 0.829 to 1.02),  $P < 0.0001$

fowlerstefin vs. LPS: Mean diff = -10.2 (95% CI: -18.2 to -2.09),  $P = 0.9977$

fowlerstefin vs. SP600125 (1  $\mu$ M): Mean diff = 122 (95% CI: 114 to 130),  $P < 0.0001$

fowlerstefin vs. SP600125 (10 M): Mean diff = 187 (95% CI: 179 to 195),  $P < 0.0001$

fowlerstefin vs. SB203580 (1  $\mu$ M): Mean diff = 127 (95% CI: 119 to 135),  $P = 0.0029$

fowlerstefin vs. SB203580 (10  $\mu$ M): Mean diff = 190 (95% CI: 182 to 198),  $P < 0.0001$

fowlerstefin vs. U0126 (1  $\mu$ M): Mean diff = 118 (95% CI: 110 to 126),  $P = 0.0005$

fowlerstefin vs. U0126 (10  $\mu$ M): Mean diff = 163 (95% CI: 154 to 171),  $P < 0.0001$

#### **Fig. 7b:**

##### **TNF (pg/ml)**

Dunnett's multiple comparisons test:

One-way ANOVA:  $F_{(8, 18)} = 790$ ,  $P < 0.0001$

fowlerstefin vs. NC: Mean diff = 312 (95% CI: 292 to 332),  $P < 0.0001$

fowlerstefin vs. LPS: Mean diff = -38.1 (95% CI: -59.0 to -17.1),  $P = 0.0004$

fowlerstefin vs. SP600125 (1  $\mu$ M): Mean diff = 144 (95% CI: 123 to 165),  $P < 0.0001$

fowlerstefin vs. SP600125 (10 M): Mean diff = 246 (95% CI: 225 to 267),  $P < 0.0001$

fowlerstefin vs. SB203580 (1  $\mu$ M): Mean diff = 46.0 (95% CI: 25.1 to 66.9),  $P < 0.0001$

fowlerstefin vs. SB203580 (10  $\mu$ M): Mean diff = 283 (95% CI: 262 to 304),  $P < 0.0001$

fowlerstefin vs. U0126 (1  $\mu$ M): Mean diff = 61.9 (95% CI: 41.0 to 82.9),  $P < 0.0001$

fowlerstefin vs. U0126 (10  $\mu$ M): Mean diff = 275 (95% CI: 254 to 296),  $P < 0.0001$

### **IL-6 (pg/ml)**

One-way ANOVA:  $F_{(8, 18)} = 1826$ ,  $P < 0.0001$

Dunnett's multiple comparisons test:

fowlerstefin vs. NC: Mean diff = 204 (95% CI: 196 to 212),  $P < 0.0001$

fowlerstefin vs. LPS: Mean diff = -10.2 (95% CI: -18.2 to -2.09),  $P = 0.0111$

fowlerstefin vs. SP600125 (1  $\mu$ M): Mean diff = 122 (95% CI: 114 to 130),  $P < 0.0001$

fowlerstefin vs. SP600125 (10 M): Mean diff = 187 (95% CI: 179 to 195),  $P < 0.0001$

fowlerstefin vs. SB203580 (1  $\mu$ M): Mean diff = 127 (95% CI: 119 to 135),  $P < 0.0001$

fowlerstefin vs. SB203580 (10  $\mu$ M): Mean diff = 190 (95% CI: 182 to 198),  $P < 0.0001$

fowlerstefin vs. U0126 (1  $\mu$ M): Mean diff = 118 (95% CI: 110 to 126),  $P < 0.0001$

fowlerstefin vs. U0126 (10  $\mu$ M): Mean diff = 163 (95% CI: 154 to 171),  $P < 0.0001$

### **Fig. 8a:**

#### **Ratio (TNF/GAPDH)**

One-way ANOVA:  $F_{(6, 14)} = 40.5$ ,  $P < 0.0001$

Dunnett's multiple comparisons test:

fowlerstefin vs. NC: Mean diff = 0.857 (95% CI: 0.616 to 1.10),  $P < 0.0001$

fowlerstefin vs. LPS: Mean diff = -0.267 (95% CI: -0.518 to -0.0157),  $P = 0.0363$

fowlerstefin vs. MG132 (1  $\mu$ M): Mean diff = 0.190 (95% CI: -0.0610 to 0.441),  $P = 0.1654$

fowlerstefin vs. MG132 (10 M): Mean diff = 0.557 (95% CI: 0.306 to 0.808),  $P = 0.0002$

fowlerstefin vs. SR11302 (1  $\mu$ M): Mean diff = 0.0700 (95% CI: -0.181 to 0.321),  $P = 0.0324$

fowlerstefin vs. SR11302 (10  $\mu$ M): Mean diff = 0.273 (95% CI: 0.022 to 0.524),  $P = 0.0317$

#### **Ratio (IL-6/GAPDH)**

One-way ANOVA:  $F_{(6, 14)} = 143$ ,  $P < 0.0001$

Dunnett's multiple comparisons test:

fowlerstefin vs. NC: Mean diff = 1.14 (95% CI: 0.969 to 1.30),  $P < 0.0001$

fowlerstefin vs. LPS: Mean diff = -0.127 (95% CI: -0.307 to 0.0534),  $P = 0.2117$

fowlerstefin vs. MG132 (1  $\mu$ M): Mean diff = 0.790 (95% CI: 0.610 to 0.970),  $P < 0.0001$

fowlerstefin vs. MG132 (10 M): Mean diff = 0.960 (95% CI: 0.780 to 1.14),  $P < 0.0001$

fowlerstefin vs. SR11302 (1  $\mu$ M): Mean diff = 0.407 (95% CI: 0.227 to 0.587),  $P = 0.0001$

fowlerstefin vs. SR11302 (10  $\mu$ M): Mean diff = 0.837 (95% CI: 0.657 to 1.02),  $P < 0.0001$

### **Fig. 8b:**

#### **TNF (pg/ml)**

One-way ANOVA:  $F_{(6, 14)} = 3049$ ,  $P < 0.0001$

Dunnett's multiple comparisons test:

fowlerstefin vs. NC: Mean diff = 307 (95% CI: 296 to 319),  $P < 0.0001$

fowlerstefin vs. LPS: Mean diff = -64.3 (95% CI: -76.9 to -51.7),  $P < 0.0001$

fowlerstefin vs. MG132 (1  $\mu$ M): Mean diff = 292 (95% CI: 279 to 305),  $P < 0.0001$

fowlerstefin vs. MG132 (10 M): Mean diff = 315 (95% CI: 302 to 328),  $P < 0.0001$

fowlerstefin vs. SR11302 (1  $\mu$ M): Mean diff = 73.8 (95% CI: 61.2 to 86.4),  $P < 0.0001$

fowlerstefin vs. SR11302 (10  $\mu$ M): Mean diff = 210 (95% CI: 198 to 223),  $P < 0.0001$

**IL-6 (pg/ml)**

One-way ANOVA:  $F_{(6, 14)} = 338$ ,  $P < 0.0001$

Dunnett's multiple comparisons test:

fowlerstefin vs. NC: Mean diff = 365 (95% CI: 326 to 404),  $P < 0.0001$

fowlerstefin vs. LPS: Mean diff = -29.7 (95% CI: -72.1 to 12.8),  $P = 0.2164$

fowlerstefin vs. MG132 (1  $\mu$ M): Mean diff = 339 (95% CI: 296 to 381),  $P < 0.0001$

fowlerstefin vs. MG132 (10 M): Mean diff = 367 (95% CI: 324 to 409),  $P < 0.0001$

fowlerstefin vs. SR11302 (1  $\mu$ M): Mean diff = 65.8 (95% CI: 23.4 to 108),  $P = 0.0030$

fowlerstefin vs. SR11302 (10  $\mu$ M): Mean diff = 239 (95% CI: 197 to 282),  $P < 0.0001$
